# Supplementary material for: Molecular Characterization, Tumor Microenvironment Association, and Drug Susceptibility of DNA Methylation-Driven Genes in Renal Cell Carcinoma
Source: Front Cell Dev Biol. 2022 Mar 21;10:837919. doi: 10.3389/fcell.2022.837919 (PMC8978676; doi:10.3389/fcell.2022.837919)
Supplement: Supplementary file 3 [file Table3.xlsx]

## Sheet: Sheet1
Table S3: Correlation between prognostic model and tumor-infiltrating immune cells.
immune	cor	pvalue
T cell CD4+_TIMER	0.168662	7.1523e-07
Neutrophil_TIMER	0.0951007	0.00541268
Myeloid dendritic cell_TIMER	0.0740227	0.0305422
B cell memory_CIBERSORT	-0.0902168	0.00834086
B cell plasma_CIBERSORT	0.0706442	0.0390166
T cell CD8+_CIBERSORT	0.251722	8.27313e-14
T cell CD4+ naive_CIBERSORT	-0.067367	0.0490638
T cell CD4+ memory activated_CIBERSORT	0.193431	1.20999e-08
T cell follicular helper_CIBERSORT	0.211413	4.38161e-10
T cell regulatory (Tregs)_CIBERSORT	0.106543	0.00182166
T cell gamma delta_CIBERSORT	0.135838	6.82535e-05
Macrophage M1_CIBERSORT	0.344305	3.55689e-25
Macrophage M2_CIBERSORT	-0.190794	2.04731e-08
Mast cell activated_CIBERSORT	-0.178738	1.45597e-07
B cell memory_CIBERSORT-ABS	-0.0743939	0.0297154
B cell plasma_CIBERSORT-ABS	0.237	2.28343e-12
T cell CD8+_CIBERSORT-ABS	0.31626	2.72413e-21
T cell CD4+ naive_CIBERSORT-ABS	-0.0671273	0.0498768
T cell CD4+ memory resting_CIBERSORT-ABS	0.174987	2.66171e-07
T cell CD4+ memory activated_CIBERSORT-ABS	0.193191	1.26227e-08
T cell follicular helper_CIBERSORT-ABS	0.274465	3.17871e-16
T cell regulatory (Tregs)_CIBERSORT-ABS	0.210304	5.42423e-10
T cell gamma delta_CIBERSORT-ABS	0.147418	1.52278e-05
NK cell activated_CIBERSORT-ABS	0.272305	5.51756e-16
Monocyte_CIBERSORT-ABS	0.113802	0.00086341
Macrophage M1_CIBERSORT-ABS	0.384232	1.97637e-31
Macrophage M2_CIBERSORT-ABS	0.144327	2.34431e-05
Myeloid dendritic cell resting_CIBERSORT-ABS	0.0672216	0.0495558
Mast cell activated_CIBERSORT-ABS	-0.0752517	0.027878
Neutrophil_CIBERSORT-ABS	0.0928526	0.00662058
B cell_QUANTISEQ	0.133076	9.59645e-05
Macrophage M1_QUANTISEQ	0.314335	4.86564e-21
Macrophage M2_QUANTISEQ	0.109916	0.00129466
Monocyte_QUANTISEQ	-0.090596	0.00807102
NK cell_QUANTISEQ	-0.0717681	0.0359996
T cell CD4+ (non-regulatory)_QUANTISEQ	-0.192108	1.52633e-08
T cell CD8+_QUANTISEQ	0.341155	1.01752e-24
T cell regulatory (Tregs)_QUANTISEQ	0.316141	2.82396e-21
Myeloid dendritic cell_QUANTISEQ	0.0792691	0.0205171
uncharacterized cell_QUANTISEQ	-0.200285	3.83312e-09
T cell_MCPCOUNTER	-0.289709	7.40357e-18
T cell CD8+_MCPCOUNTER	0.324849	1.94265e-22
cytotoxicity score_MCPCOUNTER	0.35608	0
NK cell_MCPCOUNTER	0.353342	0
B cell_MCPCOUNTER	0.199857	4.14144e-09
Monocyte_MCPCOUNTER	0.145383	2.04002e-05
Macrophage/Monocyte_MCPCOUNTER	0.145383	2.04002e-05
Myeloid dendritic cell_MCPCOUNTER	0.280851	7.98063e-17
Neutrophil_MCPCOUNTER	-0.115588	0.00071899
Endothelial cell_MCPCOUNTER	0.288376	1.06687e-17
Cancer associated fibroblast_MCPCOUNTER	0.444262	0
Myeloid dendritic cell activated_XCELL	0.219407	9.07956e-11
T cell CD4+ naive_XCELL	0.117673	0.000569537
T cell CD4+ central memory_XCELL	-0.0951206	0.00540295
T cell CD4+ effector memory_XCELL	0.106556	0.00181938
T cell CD8+ naive_XCELL	0.187576	3.33939e-08
T cell CD8+_XCELL	0.239611	1.2882e-12
T cell CD8+ central memory_XCELL	0.229054	1.25114e-11
T cell CD8+ effector memory_XCELL	0.28083	6.08183e-17
Class-switched memory B cell_XCELL	-0.0816397	0.0170203
Common lymphoid progenitor_XCELL	0.233308	5.07235e-12
Endothelial cell_XCELL	0.253763	5.1332e-14
Eosinophil_XCELL	-0.2927	2.47784e-18
Cancer associated fibroblast_XCELL	0.0704282	0.0396205
Granulocyte-monocyte progenitor_XCELL	0.101606	0.00295269
Hematopoietic stem cell_XCELL	0.172809	3.75608e-07
Macrophage_XCELL	-0.0683604	0.0458114
Macrophage M1_XCELL	-0.148683	1.28346e-05
Macrophage M2_XCELL	-0.0735121	0.0317118
Mast cell_XCELL	-0.190563	1.99726e-08
Monocyte_XCELL	0.188028	3.09096e-08
T cell NK_XCELL	0.406785	2.28105e-35
T cell CD4+ Th1_XCELL	0.36876	6.68418e-29
immune score_XCELL	0.124958	0.000254181
stroma score_XCELL	0.299115	4.12248e-19
microenvironment score_XCELL	0.308973	2.36631e-20
B cell_EPIC	0.100909	0.00316819
Cancer associated fibroblast_EPIC	0.45307	0
T cell CD4+_EPIC	-0.231304	8.98447e-12
T cell CD8+_EPIC	0.109662	0.00133649
Endothelial cell_EPIC	0.221882	6.21851e-11
Macrophage_EPIC	0.128894	0.00016067
NK cell_EPIC	0.176992	2.02413e-07
uncharacterized cell_EPIC	-0.221198	7.13382e-11
